# Supplementary material
Source: PubMed Central journal article supplement (PMC5017206)
Supplement: NIHMS607654-supplement-SuppFigs.pdf [file NIHMS607654-supplement-SuppFigs.pdf]

# Supplemental Figure 1.

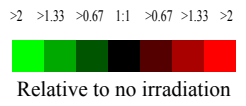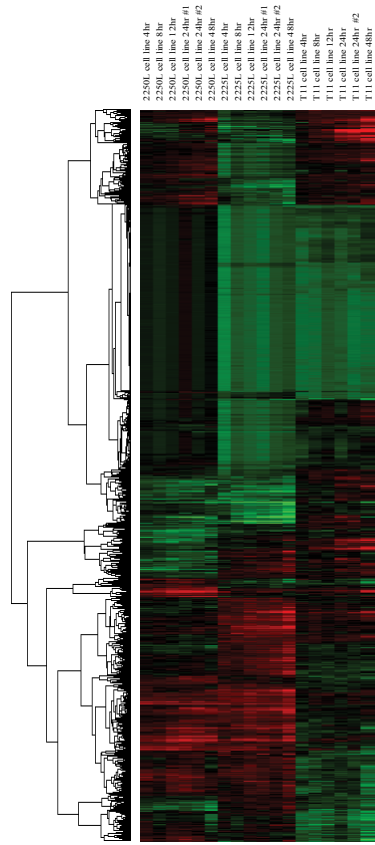

A

2250L cell line 4hr  
 2250L cell line 8hr  
 2250L cell line 12hr  
 2250L cell line 24hr #1  
 2250L cell line 24hr #2  
 2250L cell line 48hr  
 2225L cell line 4hr  
 2225L cell line 8hr  
 2225L cell line 12hr  
 2225L cell line 24hr #1  
 2225L cell line 24hr #2  
 2225L cell line 48hr  
 T11 cell line 4hr  
 T11 cell line 8hr  
 T11 cell line 12hr  
 T11 cell line 24hr #1  
 T11 cell line 24hr #2  
 T11 cell line 48hr

A

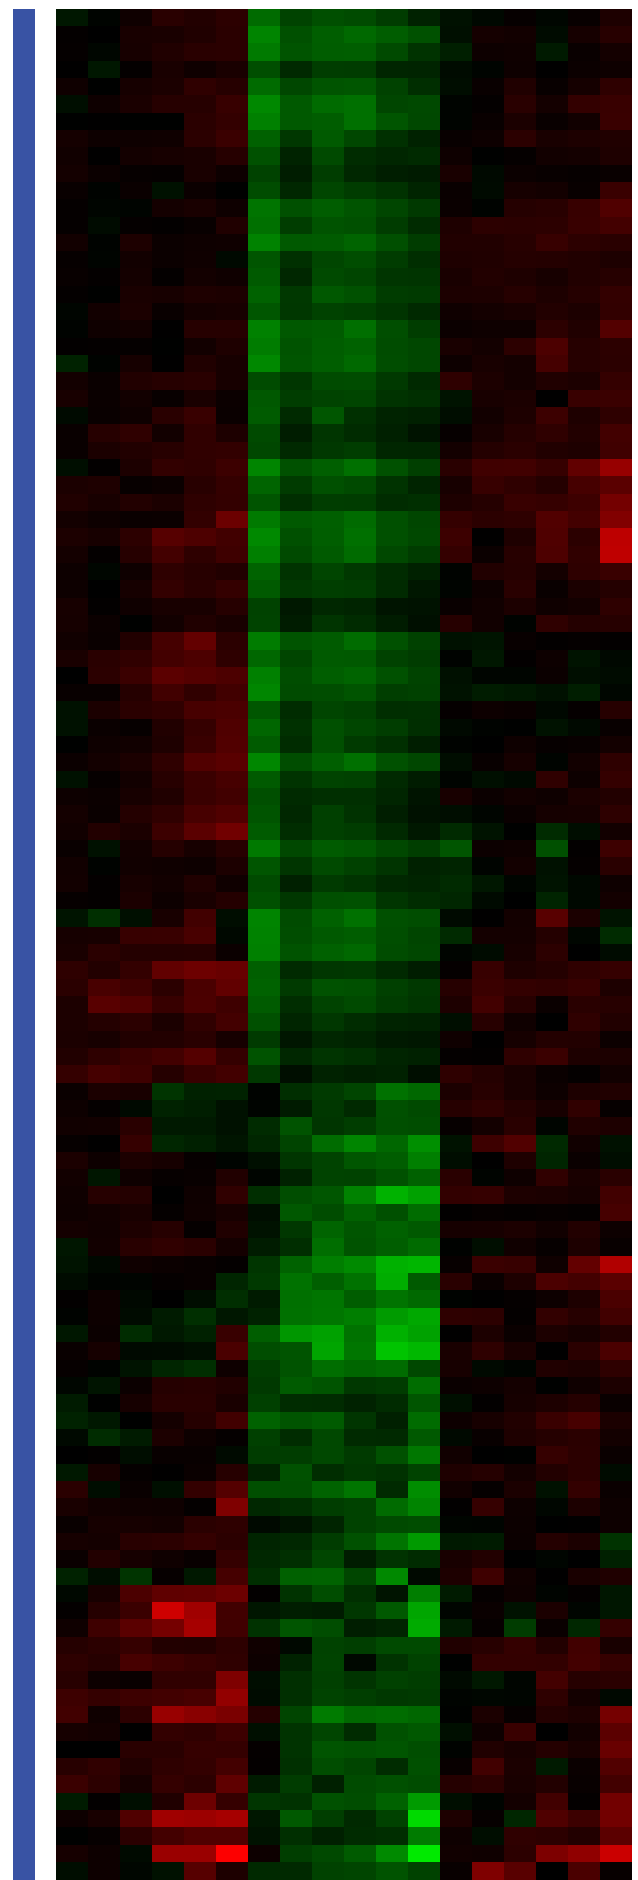

DNPEP  
 TMEM132A  
 DAP  
 NDUFA9  
 NDUFA6  
 POR  
 PSME2  
 CTSZ  
 SLC3A2  
 POLR2F  
 ZCRB1  
 IGFBP6  
 APLP2  
 PDRG1  
 CCDC56  
 PSMB10  
 PSMB10  
 LZTS2  
 SERPINF1  
 PTPLA  
 IL17RC  
 CBR3  
 SAP18  
 DDR2  
 RNF181  
 GCAT  
 H2-K1  
 DYNLRB1  
 YAF2  
 PSME2  
 CEBPB  
 CEBPB  
 SNAP47  
 PAIP2  
 KCMF1  
 DTNBP1  
 SCD2  
 CCND2  
 FDF1  
 DUSP4  
 CERK  
 TSPO  
 TSPO  
 LIMD2  
 MAPK8IP3  
 TSC22D4  
 CHMP4B  
 GPX4  
 2310016M24RIK  
 A\_52\_P576678  
 PRKACA  
 EMPTYP000009-005  
 TAGLN  
 ENSMUST0000092884  
 CCND2  
 LIMA1  
 DUSP12  
 TGIF2  
 CHMP4B  
 2310021P13RIK  
 CCND2  
 TNFRSF1A  
 FAM195A  
 1810029B16RIK  
 CYP2S1  
 4930520O04RIK  
 PRMT7  
 RHPN2  
 SYT7  
 RPP40  
 ARHGDIG  
 ARHGDIG  
 STAB1  
 BCL2L15  
 2010204K13RIK  
 GGCT  
 1700049E17RIK1  
 BC094917  
 GM3161  
 RAP1GAP2  
 RHOBTB2  
 TINAGL1  
 SYK  
 MECOM  
 ECE2  
 RAP1GAP2  
 NGER  
 GUF1  
 CDK5R1  
 TSPAN33  
 EMPTYP093165-001  
 9930105H17RIK  
 TLN2  
 ADD2  
 ARHGDIG  
 RND1  
 BDNF  
 BDNF  
 FCGR3  
 NKPD1  
 STBD1  
 NKPD1  
 RAP1GAP2  
 HMHA1  
 ADD2  
 NRIP1  
 LCE3F  
 KBTBD11



# Supplemental Figure 3.

>2 >1.33 >0.67 1:1 >0.67 >1.33 >2  
 Relative to no irradiation

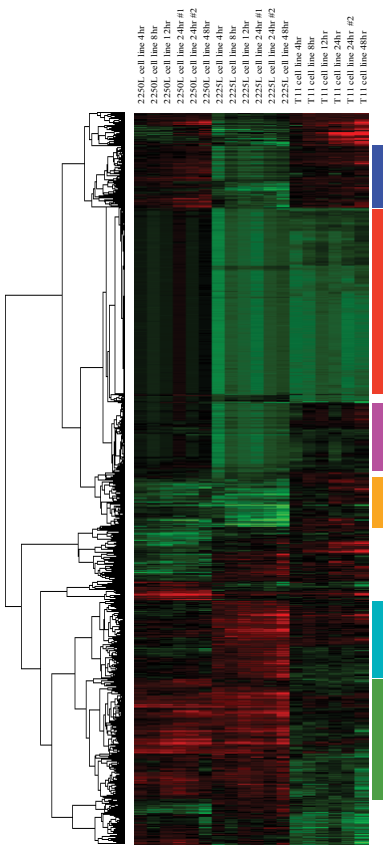

C

2250L cell line 4hr  
 2250L cell line 8hr  
 2250L cell line 12hr  
 2250L cell line 24hr #1  
 2250L cell line 24hr #2  
 2250L cell line 48hr  
 2225L cell line 4hr  
 2225L cell line 8hr  
 2225L cell line 12hr  
 2225L cell line 24hr #1  
 2225L cell line 24hr #2  
 2225L cell line 48hr  
 T11 cell line 4hr  
 T11 cell line 8hr  
 T11 cell line 12hr  
 T11 cell line 24hr #1  
 T11 cell line 24hr #2  
 T11 cell line 48hr

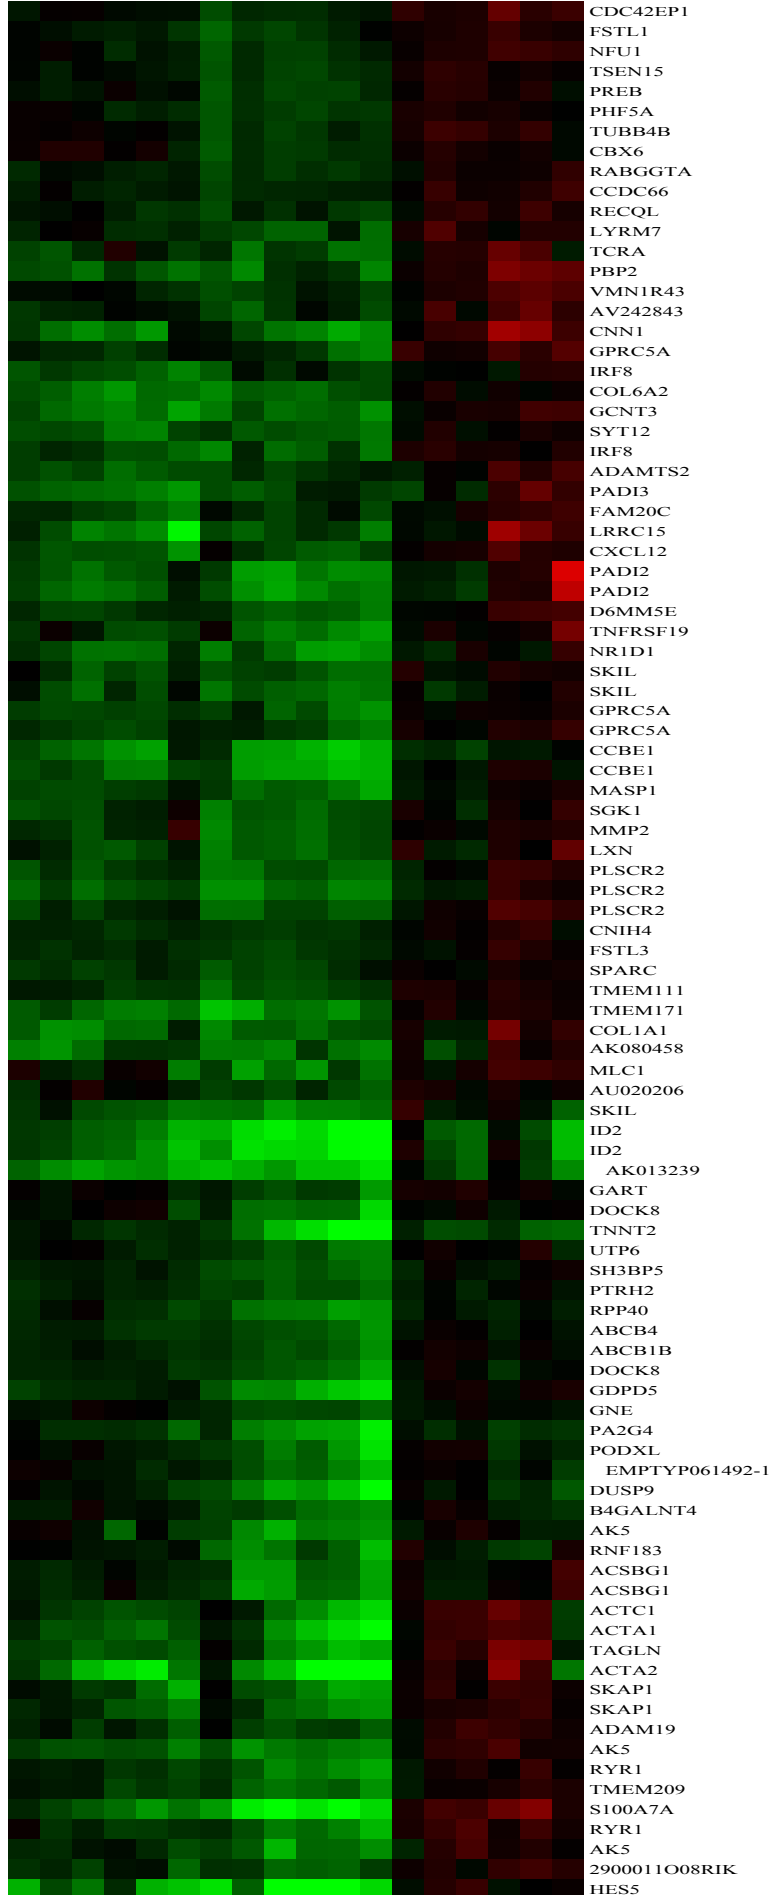

# Supplemental Figure 4.

>2 >1.33 >0.67 1.1 >0.67 >1.33 >2

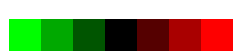

Relative to no irradiation

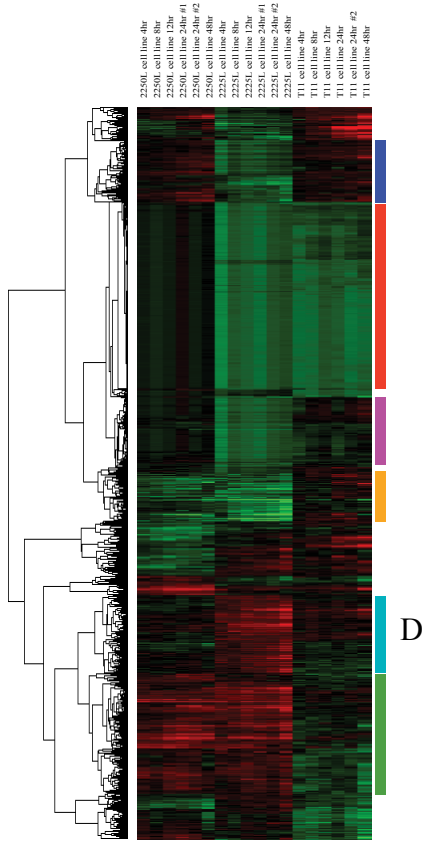

D

D

2250L cell line 4hr  
2250L cell line 8hr  
2250L cell line 12hr  
2250L cell line 24hr #1  
2250L cell line 24hr #2  
2250L cell line 48hr  
2255L cell line 4hr  
2255L cell line 8hr  
2255L cell line 12hr  
2255L cell line 24hr #1  
2255L cell line 24hr #2  
2255L cell line 48hr  
T11 cell line 4hr  
T11 cell line 8hr  
T11 cell line 12hr  
T11 cell line 24hr #1  
T11 cell line 24hr #2  
T11 cell line 48hr

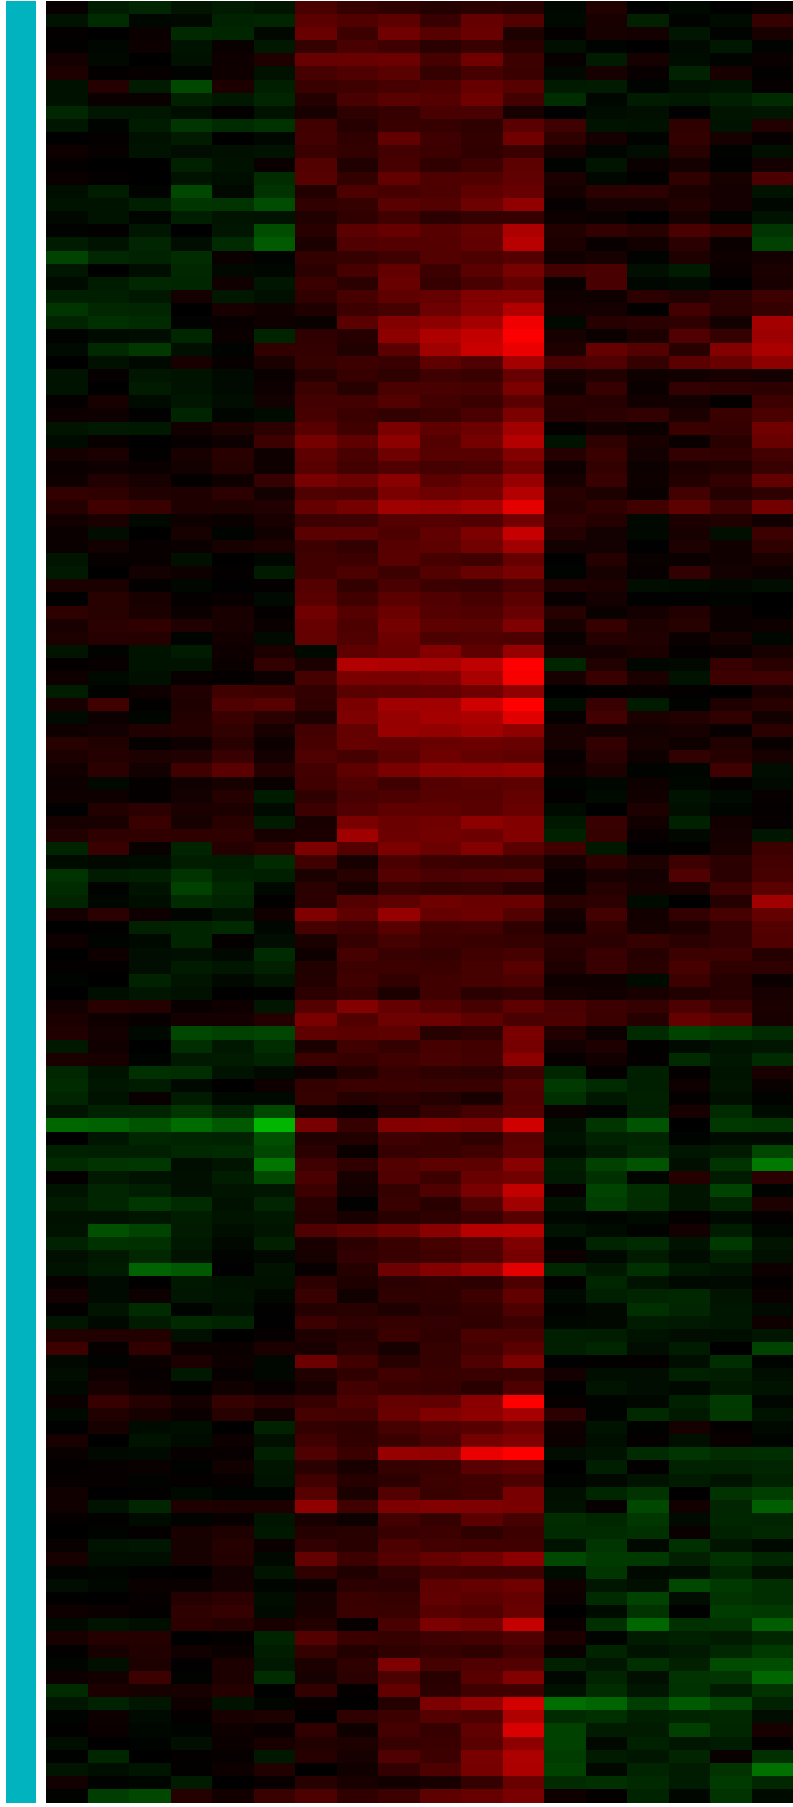

DENND4B  
GDF10  
GPR30  
DUSP18  
LGALS2  
NAB2  
GALNT9  
FAM125B  
ARHGGEF40  
KIF13  
DDR1  
PPP1R12A  
ZDHHC20  
A\_51\_P350172  
SLC16A3  
SDC2  
TMEM165  
CES1G  
CES1G  
ROBO1  
EFS  
COL6A2  
M17518  
SPHK1  
NOTCH3  
PDK1  
PLXDC1  
PVR  
BLOC1S1  
RNF19A  
ENAH  
SFSW1  
ARHGAP24  
ZFP52  
MTMR6  
MTMR6  
ZFP52  
TACC1  
MTSS1  
MRM1  
PDE1A  
EBAC9  
2510003E04RIK  
WDR33  
ASB8  
REV3L  
COL4A3BP  
ENAH  
SNX25  
MME  
RASGRP2  
NFATC4  
MXRA8  
3110057O12RIK  
MME  
SESN3  
NAB2  
CPNE1  
ANKRD44  
MIBNL2  
STK24  
DUSP18  
ZMAT1  
ZMAT1  
P2RY1  
RNF6  
TGFB2  
SPRY1  
RAPGEF3  
OBFC2A  
OBFC2A  
PTPRF  
FRMD6  
IRX1  
KCTD9  
PCDHGA9  
RASSF7  
GM12824  
2310061J03RIK  
SFXN3  
A1627138  
KDM3A  
STAT3  
RAB22A  
COL18A1  
KLF2  
POLM  
FOXO1  
VDR  
H60A  
SOCS2  
MGST3  
ZFP11  
NOTUM  
FLT1  
FLT1  
ANKRD37  
TMEM223  
ARID5B  
ZFP954  
PLBD2  
ALKBH5  
NTN3  
RIPPLY3  
SPRED1  
MLL5  
MARK1  
PDZRN3  
GAS1  
5330426P16RIK  
MEST  
DUSP18  
IPMK  
FAM102B  
TLE4  
6430527G18RIK  
IQGAP1  
MAP3K1  
SHOX2  
TCF4  
PDZRN3  
VCAN  
VCAN  
GPCPD1  
IPMK  
STK24  
FLT1  
FAM162A  
SFSWAP  
CD34  
ITGA7  
RHOBTB1  
NOXO1  
KAT2B  
RHOJ  
TMEM87B  
TLE4
